# Supplementary material for: G6PD inhibition sensitizes ovarian cancer cells to oxidative stress in the metastatic omental microenvironment
Source: PubMed Central journal article supplement — Cell Rep. Author manuscript; Available in PMC 2022 Oct 5. (PMC9534522; doi:10.1016/j.celrep.2022.111012), 2022-06-28
Supplement: NIHMS1819963-supplement-1.pdf [file NIHMS1819963-supplement-1.pdf]

**Supplemental information**

**G6PD inhibition sensitizes ovarian cancer cells  
to oxidative stress in the metastatic  
omental microenvironment**

**Shree Bose, Qiang Huang, Yunhan Ma, Lihua Wang, Grecia O. Rivera, Yunxin Ouyang, Regina Whitaker, Rebecca A. Gibson, Christopher D. Kontos, Andrew Berchuck, Rebecca A. Previs, and Xiling Shen**

## Supplementary Figures

### Supplementary Figure 1

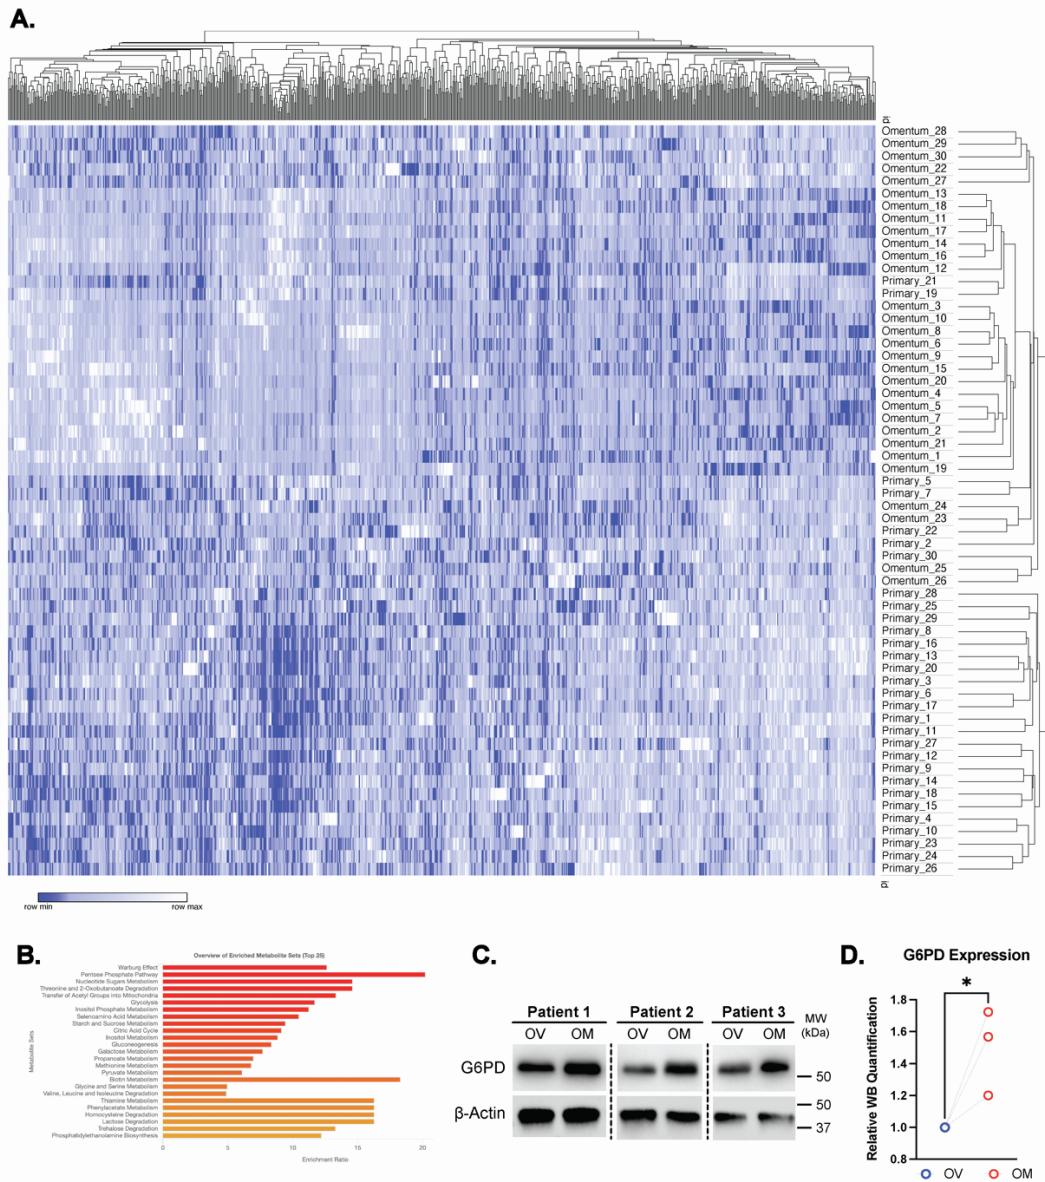

**Figure S1: Gene expression and metabolomics analysis highlight PPP changes in matched human ovarian and omental tumors, Related to Figure 1. (A)** Hierarchical clustering of heatmap of metabolic gene expression data from ovarian and omental tumors (n=30) show clustering of primary tumors and metastatic tumors independently. **(B)** Pathway analysis of metabolite abundance differences from LC-MS metabolomics analysis of matched primary ovarian tumor vs. omental metastases (n=8) highlight the pentose phosphate pathway. **(C)** Immunoblotting for G6PD in ovarian and omental tumors (n=3). **(D)** Quantification was performed by normalizing protein expression to the loading  $\beta$ -actin control and the primary tumor expression. Omental metastases exhibited increased G6PD expression (p-val<0.05, Student's *t*-Test).

Supplementary Figure 2

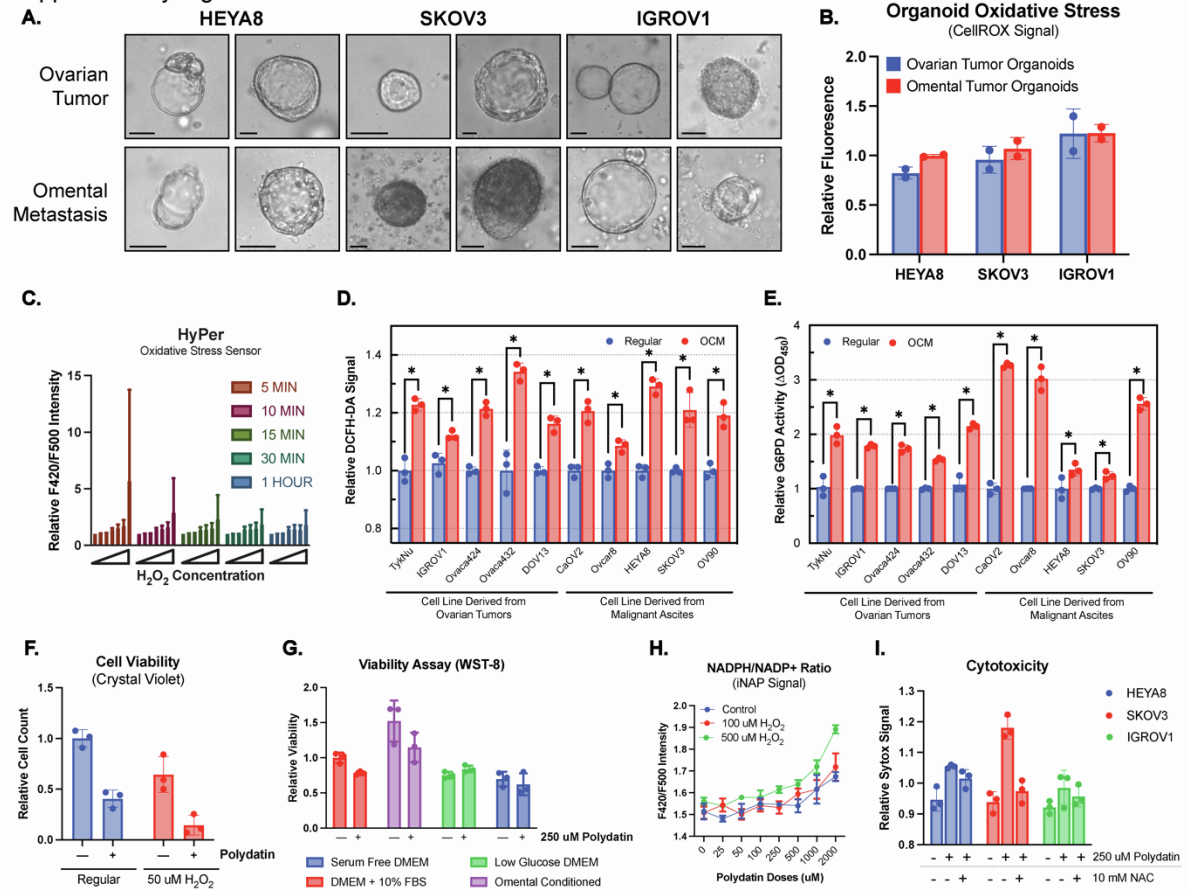

**Figure S2: *In vitro* models of OC reflect changes in oxidative stress, Related to Figure 3. (A)** Organoids were derived from murine ovarian tumors and omental metastases (n=2 per cell line). Scale bars represent 100  $\mu$ M. **(B)** Oxidative stress of organoids cultured in organoid media measured using CellROX reveal minimal differences (n=2). **(C)** Fluorimetry of OC cells expressing HyPer was responsive to hydrogen peroxide exposure (n=3). Growth in OCM induced increases in **(D)** oxidative stress as measured via DCFH-DA incubation (n=3) and **(E)** G6PD activity as measured via enzymatic assay in 10 OC cell lines (n=3). **(F)** Crystal Violet and **(G)** WST-8 cell viability assays revealed less viable cells evident in OCM-polydatin treated samples (n=3). **(H)** iNAP fluorescence revealed increased NADPH/NADP<sup>+</sup> in cells treated with polydatin (n=3). **(I)** N-acetylcysteine (NAC) treatment reversed these cytotoxic effects *in vitro* (n=3). The sample size (n) represents the number of technical replicates. Where indicated, statistical significance is noted using \* p<0.05, \*\* p<0.01 by two-tailed Student's *t*-Test.

Supplementary Figure 3

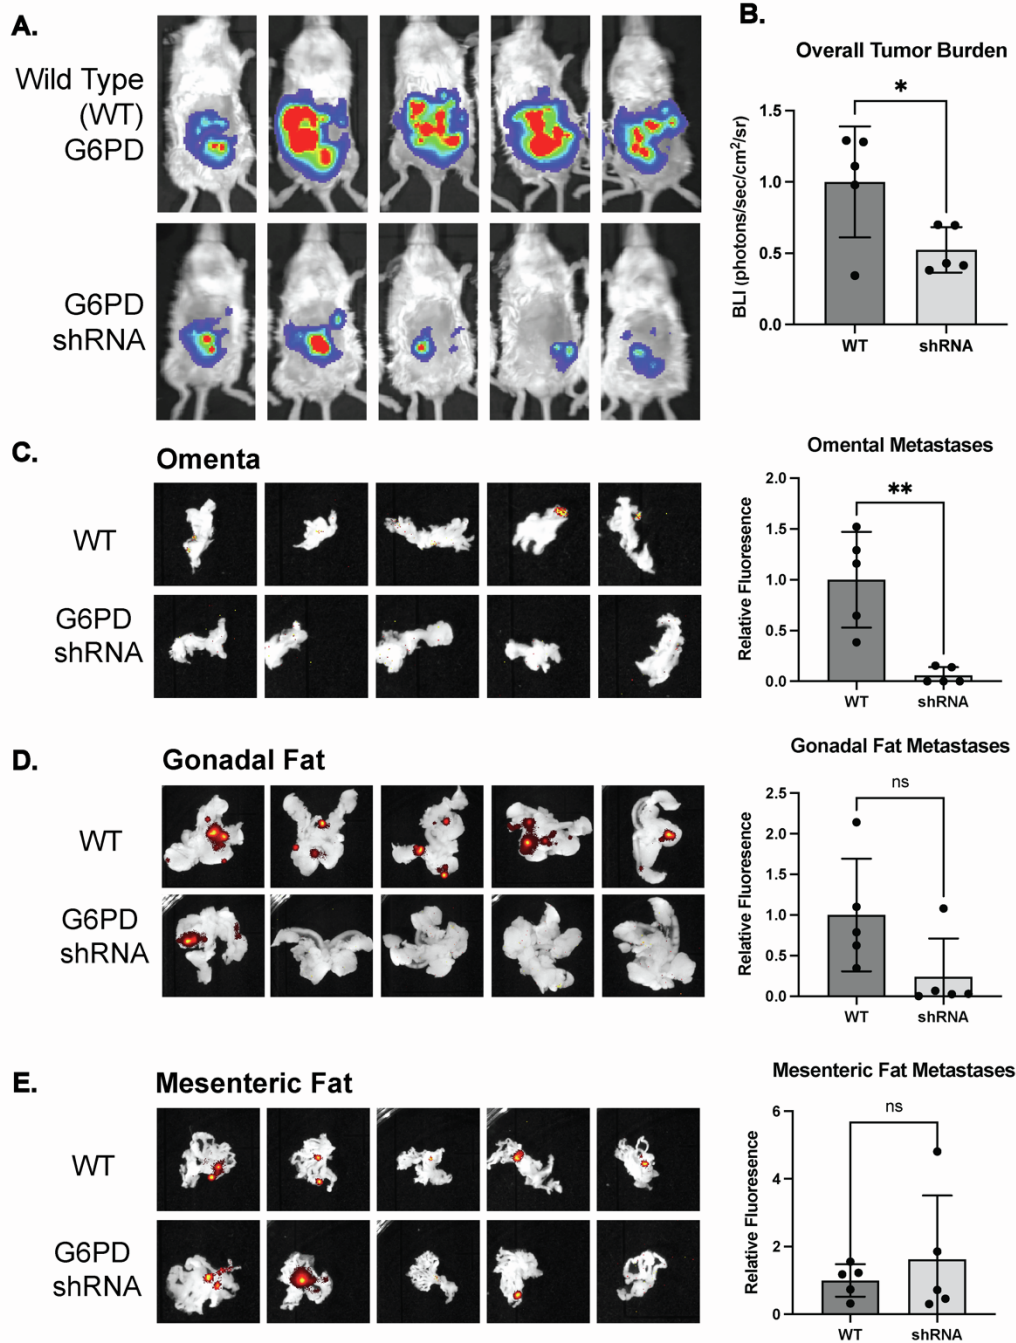

**Figure S3: G6PD-shRNA knockdown reduces omental metastases *in vivo*, Related to Figure 4.** (A) IVIS imaging and (B) quantification of tumor burden in NSG mice injected with wild-type and G6PD-shRNA expressing HEYA8-mCherry cells (n=5 per cohort). Fluorescence imaging and quantification of mCherry-expressing tumor burden in (C) omenta, (D) gonadal, and (E) mesenteric fat deposits (n=5 per cohort).

Supplementary Figure 4

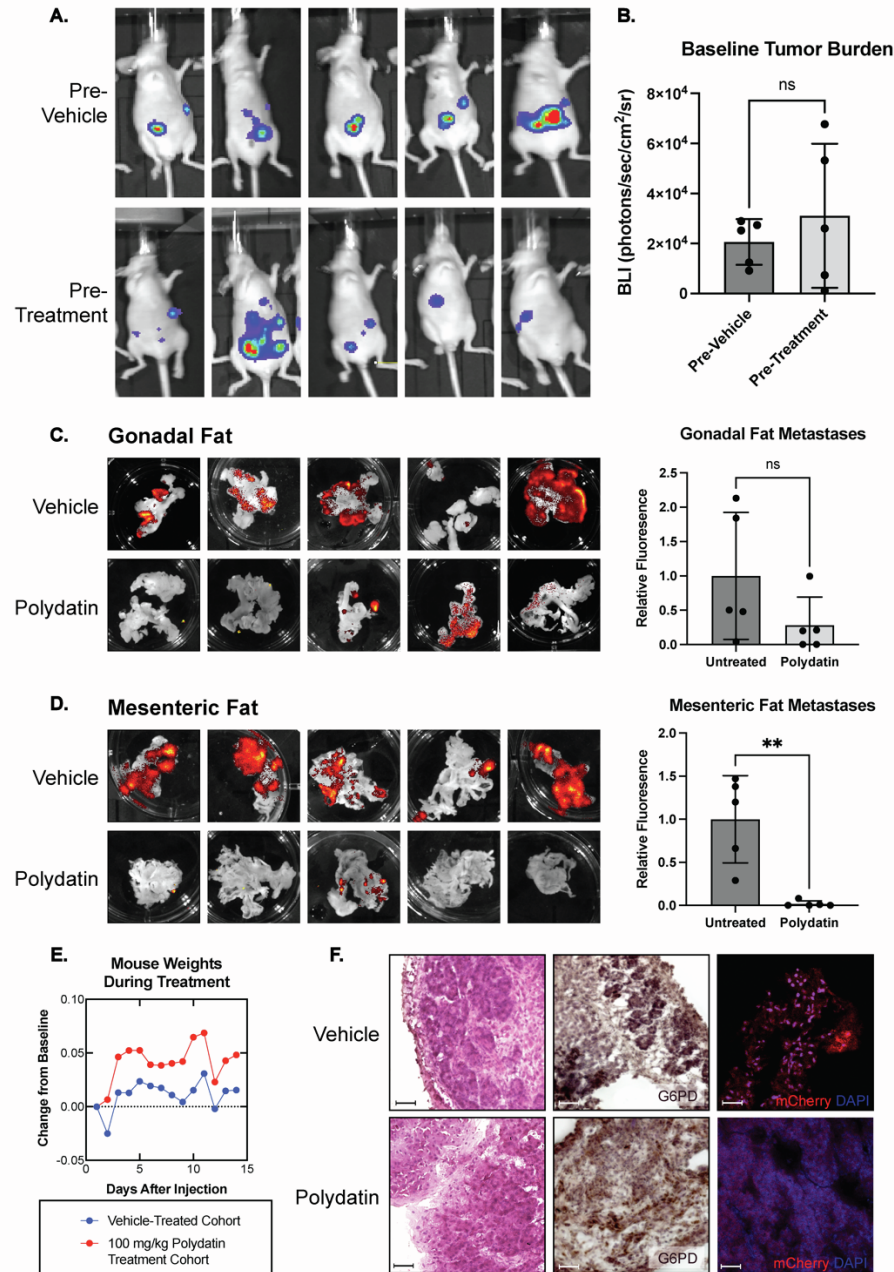

**Figure S4: High-dose polydatin treatment (100 mg/kg) reduces mesenteric metastases *in vivo*, Related to Figure 4. (A) IVIS imaging and (B) quantification of baseline tumor engraftment taken 3 days post-injection of HEYA8-mCherry injected mice (n=5 per cohort). Fluorescence imaging and quantification of mCherry-expressing tumor burden in (C) gonadal and (D) mesenteric fat deposits. (E) Weights of mice did not vary significantly during course of treatment (each symbol is average of 5 mice per cohort, no statistically significant differences seen). (F) H&E, G6PD staining, and mCherry microscopy of omental tumors revealed similar tumor morphology between vehicle and polydatin treated tumors. Scale bars represent 100  $\mu$ M.**



Supplementary Figure 5

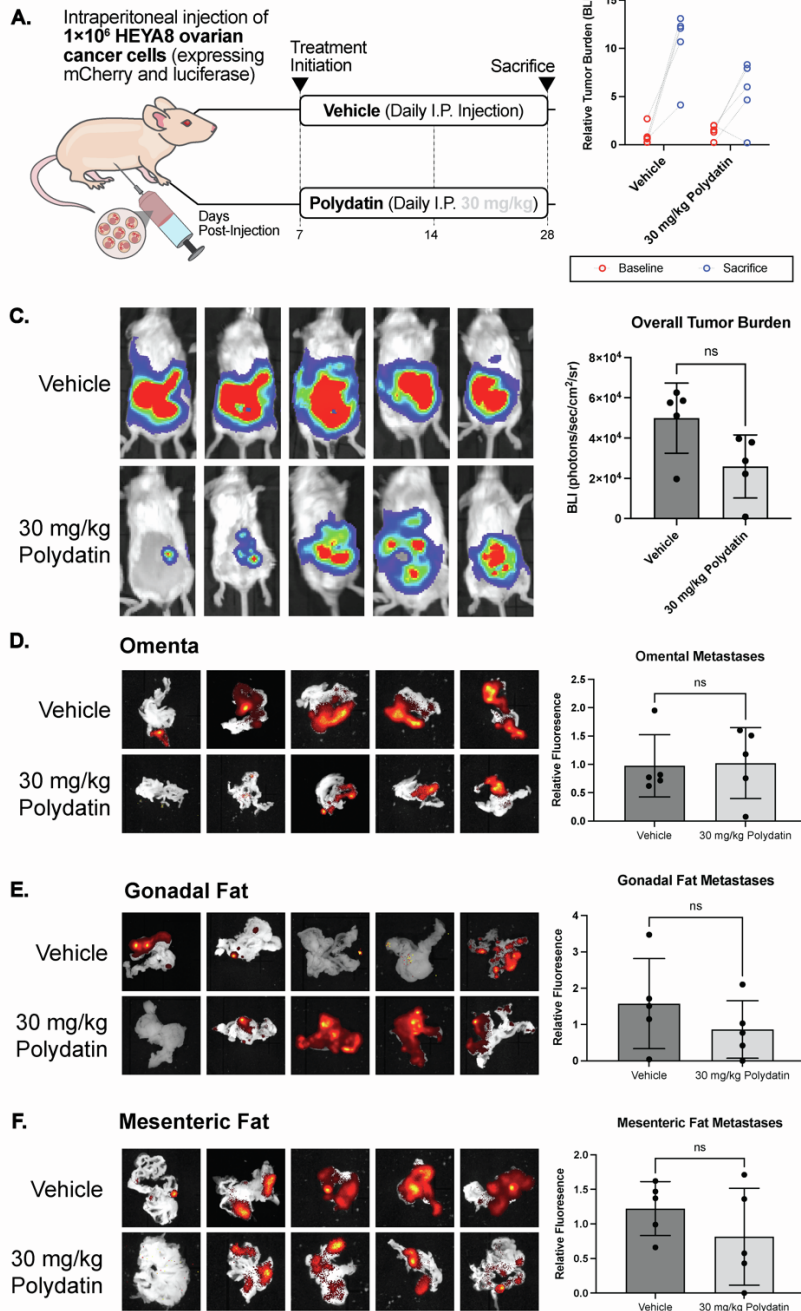

**Figure S5: Low-dose polydatin (30 mg/kg) treatment does not achieve therapeutic threshold *in vivo*, Related to Figure 4. (A) Schema for treatment. (B) Bioluminescence (BLI) was measured at baseline and prior to sacrifice using IVIS (n=5 per cohort). (C) IVIS imaging and BLI quantification prior to sacrifice shows tumor burden in 30 mg/kg polydatin treated and vehicle treated mice (n=5 per cohort). Fluorescence imaging and quantification of mCherry-expressing tumor burden in (D)**

omenta, (E) gonadal, and (F) mesenteric fat deposits (n=5 per cohort). Labels of n.s. indicate “not significant” (p-val>0.05)

| <b>Media Component</b>         | <b>Final Concentration</b> |
|--------------------------------|----------------------------|
| <b>DMEM/F12</b>                |                            |
| <b>GlutaMax</b>                | 1x                         |
| <b>Penicillin/Streptomycin</b> | 100 U/mL                   |
| <b>17-B-Estradiol</b>          | 10 nM                      |
| <b>A083-01</b>                 | 250 nM                     |
| <b>B27 (without Vitamin A)</b> | 1x                         |
| <b>EGF</b>                     | 50 ng/mL                   |
| <b>HGF</b>                     | 10 ng/mL                   |
| <b>IGF1</b>                    | 20 ng/mL                   |
| <b>N2 Supplement</b>           | 1x                         |
| <b>N-Acetylcysteine</b>        | 5 mM                       |
| <b>Neuregulin I</b>            | 10 ng/mL                   |
| <b>Nicotinamide</b>            | 5 mM                       |
| <b>Noggin</b>                  | 100 ng/mL                  |
| <b>R-Spondin 1</b>             | 50 ng/mL                   |
| <b>SB203580 (p38i)</b>         | 1 uM                       |
| <b>Y-27632</b>                 | 10 uM                      |

**Table S1: OC Organoid Media Composition, Related to STAR Methods.**

| <b>Patient Number</b> | <b>Ovarian Tumor ID</b> | <b>Omental Tumor ID</b> | <b>FIGO Stage</b> | <b>Age</b> |
|-----------------------|-------------------------|-------------------------|-------------------|------------|
| <b>1</b>              | 1579                    | 1577                    | 4                 | 37         |
| <b>2</b>              | 1716                    | 1714                    | 4                 | 70         |
| <b>3</b>              | 1844                    | 1842                    | 3C                | 67         |
| <b>4</b>              | 1925                    | 1924                    | 4                 | 73         |
| <b>5</b>              | 3427                    | 3428                    | 3C                | 45         |
| <b>6</b>              | 3454                    | 3451                    | 3C                | 57         |
| <b>7</b>              | 3474                    | 3475                    | 3C                | 45         |
| <b>8</b>              | 6053                    | 6054                    | 3C                | 68         |

**Table S2: Information About Human Tumor Samples, Related to STAR Methods.**
